# Supplementary material for: Fallowed agricultural lands dominate anthropogenic dust sources in California.
Source: Research Square preprint supplement (doi:10.21203/rs.3.rs-5423663/v1), 2024-12-17
Supplement: Supplementary file 1 [file cf35f15ac1217aa20a80dab2.docx]

**Supplementary Materials for**

**Fallowed agricultural lands dominate anthropogenic dust sources in California.**

Adeyemi A. Adebiyi1, Md. Minhazul Kibria1, John Abatzoglou2, Paul Ginoux3, Satyendra Pandey1, Alexandra Heaney4, Shu-Hua Chen5, Akintomide A. Akinsanola6,7

*1Department of Life and Environmental Sciences, University of California Merced, CA, USA*

*2Department of Management of Complex Systems, University of California Merced, CA, USA*

*3NOAA/OAR Geophysical Fluid Dynamics Laboratory, Princeton, NJ, USA*

*4Herbert Wertheim School of Public Health, University of California San Diego, San Diego, CA, USA*

*5Department of Land, Air and Water Resources, University of California Davis, Davis, CA, USA*

*6Department of Earth and Environmental Sciences, University of Illinois Chicago, Chicago, IL, USA*

*7Environmental Science Division, Argonne National Laboratory, Lemont, IL, USA*

Figure S- 1: Example of dust from the agricultural-dominated Central Valley. The figure shows satellite images from NASA WorldView, dust optical depth obtained from MODIS (see Method), and measurements of coarse-mode particulate matter (PM10-PM2.5) from the EPA station at Fresno.


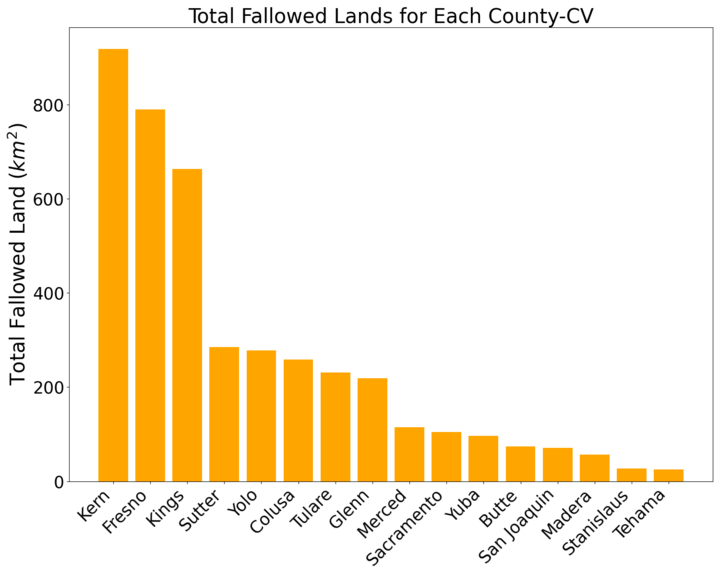


Figure S- 2: Total fallowed lands per county in Central Valley.

Figure S- 3: Same as Fig. 2b but for each year.

Figure S- 4: Monthly distribution of the percentage difference between fallowed land and non-fallowed land areas for (a) land surface temperature, (b) soil moisture, and (c) normalized difference vegetation index.

Figure S- 5: Like Fig. 3a, but for each month

Figure S- 6: Similar to Fig. 4a but as a function of months.

Figure S- 7: Spatial distribution of the assigned categories for crop types that are planned before they are fallowed.

Figure S- 8: Same as Fig. 4d but for each crop types

Figure S- 9: (a) The correlation between dust mass obtained from IMPROVE stations at Fresno and Sequoia (brown line), and Yosemite (red line). (b) The wind rose at Fresno.

Figure S- 10: (a) Same as Fig. 5e, and (b) for locations and days with dust load greater than 0.3 g/m3.


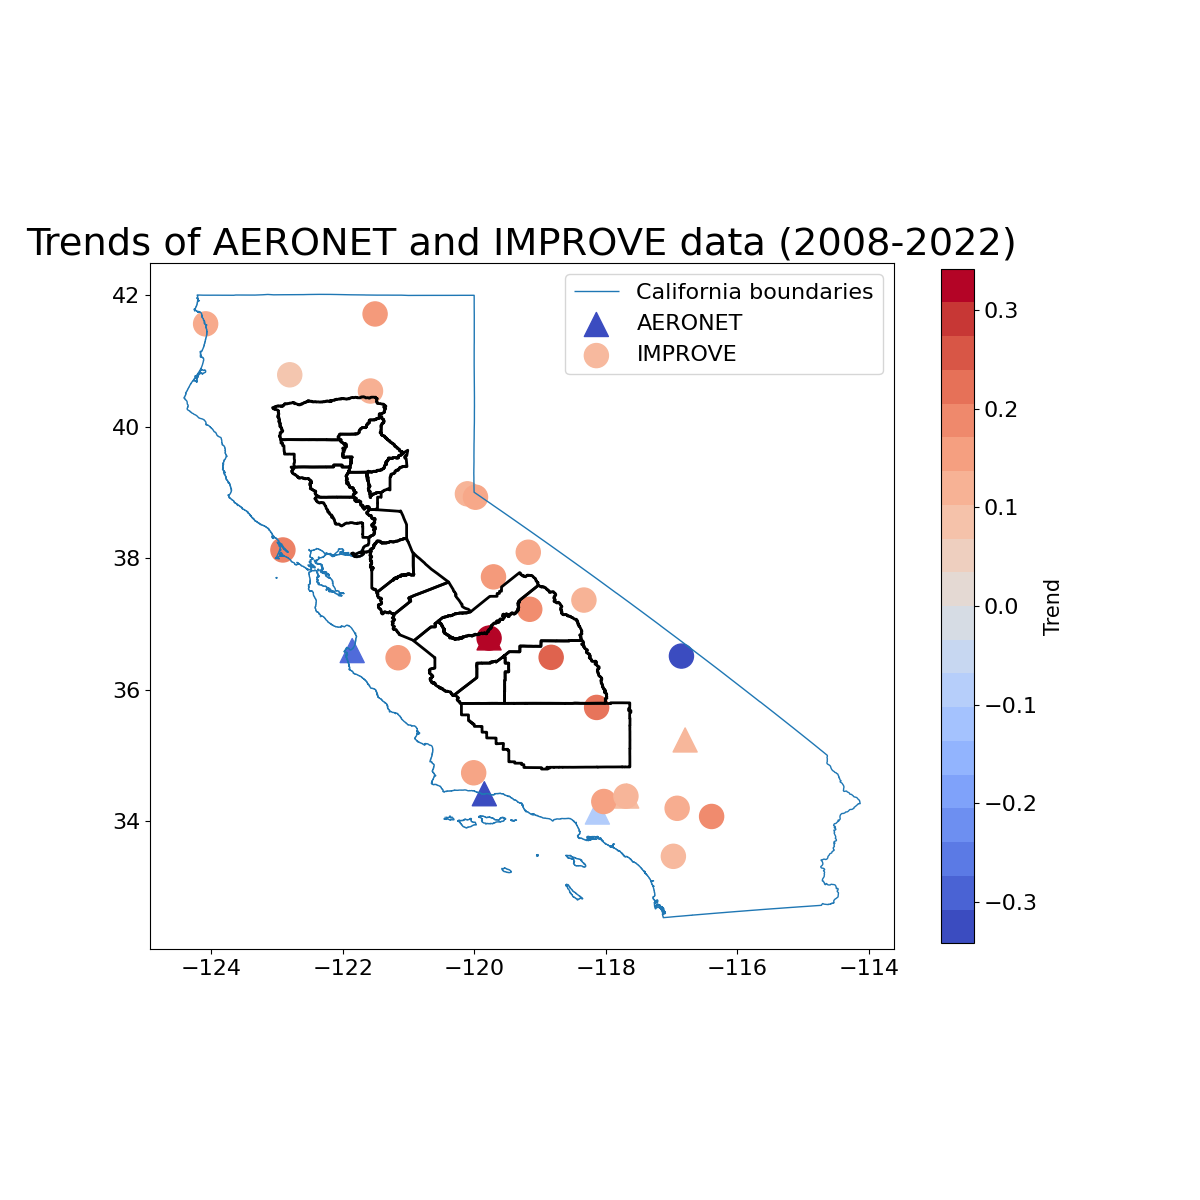


Figure S- 11: Trends (per year) in AERONET and IMPROVE aerosol data.

Table 1: Showing the assigned category for crop types used as part of analysis in Fig. 4d and fig. S-6. The table excludes non-crop land cover types such Barren, Forest, Urban, Grassland, Water, Wetlands, and other Unclassified land covers such as Clouds and Perennial Ice.

| **CDL Value** | **CDL Crop Types** | **Assigned Category** |
| --- | --- | --- |
| 72 | Citrus | Citrus_Subtropical |
| 211 | Olives | Citrus_Subtropical |
| 212 | Oranges | Citrus_Subtropical |
| 215 | Avocados | Citrus_Subtropical |
| 1 | Corn | Corn_Cotton |
| 2 | Cotton | Corn_Cotton |
| 12 | Sweet Corn | Corn_Cotton |
| 13 | Pop or Orn Corn | Corn_Cotton |
| 66 | Cherries | Deciduous_Fruits_Nuts |
| 67 | Peaches | Deciduous_Fruits_Nuts |
| 68 | Apples | Deciduous_Fruits_Nuts |
| 71 | Other Tree Crops | Deciduous_Fruits_Nuts |
| 74 | Pecans | Deciduous_Fruits_Nuts |
| 75 | Almonds | Deciduous_Fruits_Nuts |
| 76 | Walnuts | Deciduous_Fruits_Nuts |
| 77 | Pears | Deciduous_Fruits_Nuts |
| 204 | Pistachios | Deciduous_Fruits_Nuts |
| 210 | Prunes | Deciduous_Fruits_Nuts |
| 217 | Pomegranates | Deciduous_Fruits_Nuts |
| 218 | Nectarines | Deciduous_Fruits_Nuts |
| 220 | Plums | Deciduous_Fruits_Nuts |
| 223 | Apricots | Deciduous_Fruits_Nuts |
| 26 | Dbl Crop WinWht/Soybeans | Double_Field_Grain |
| 225 | Dbl Crop WinWht/Corn | Double_Field_Grain |
| 226 | Dbl Crop Oats/Corn | Double_Field_Grain |
| 228 | Dbl Crop Triticale/Corn | Double_Field_Grain |
| 230 | Dbl Crop Lettuce/Durum Wht | Double_Field_Grain |
| 231 | Dbl Crop Lettuce/Cantaloupe | Double_Field_Grain |
| 232 | Dbl Crop Lettuce/Cotton | Double_Field_Grain |
| 233 | Dbl Crop Lettuce/Barley | Double_Field_Grain |
| 234 | Dbl Crop Durum Wht/Sorghum | Double_Field_Grain |
| 235 | Dbl Crop Barley/Sorghum | Double_Field_Grain |
| 236 | Dbl Crop WinWht/Sorghum | Double_Field_Grain |
| 237 | Dbl Crop Barley/Corn | Double_Field_Grain |
| 238 | Dbl Crop WinWht/Cotton | Double_Field_Grain |
| 239 | Dbl Crop Soybeans/Cotton | Double_Field_Grain |
| 240 | Dbl Crop Soybeans/Oats | Double_Field_Grain |
| 241 | Dbl Crop Corn/Soybeans | Double_Field_Grain |
| 254 | Dbl Crop Barley/Soybeans | Double_Field_Grain |
| 4 | Sorghum | Field_Crops |
| 5 | Soybeans | Field_Crops |
| 6 | Sunflower | Field_Crops |
| 10 | Peanuts | Field_Crops |
| 11 | Tobacco | Field_Crops |
| 29 | Millet | Field_Crops |
| 30 | Speltz | Field_Crops |
| 31 | Canola | Field_Crops |
| 32 | Flaxseed | Field_Crops |
| 33 | Safflower | Field_Crops |
| 34 | Rape Seed | Field_Crops |
| 35 | Mustard | Field_Crops |
| 38 | Camelina | Field_Crops |
| 41 | Sugarbeets | Field_Crops |
| 45 | Sugarcane | Field_Crops |
| 56 | Hops | Field_Crops |
| 21 | Barley | Grain_Hay |
| 22 | Durum Wheat | Grain_Hay |
| 23 | Spring Wheat | Grain_Hay |
| 24 | Winter Wheat | Grain_Hay |
| 25 | Other Small Grains | Grain_Hay |
| 27 | Rye | Grain_Hay |
| 28 | Oats | Grain_Hay |
| 39 | Buckwheat | Grain_Hay |
| 205 | Triticale | Grain_Hay |
| 69 | Grapes | Grapes |
| 36 | Alfalfa | Irrigated_Pasture |
| 37 | Other Hay/Non Alfalfa | Irrigated_Pasture |
| 58 | Clover/Wildflowers | Irrigated_Pasture |
| 59 | Sod/Grass Seed | Irrigated_Pasture |
| 60 | Switchgrass | Irrigated_Pasture |
| 224 | Vetch | Irrigated_Pasture |
| 3 | Rice | Rice |
| 64 | Shrubland | Shrubland |
| 152 | Shrubland | Shrubland |
| 14 | Mint | Truck_Crops_Berries |
| 42 | Dry Beans | Truck_Crops_Berries |
| 43 | Potatoes | Truck_Crops_Berries |
| 44 | Other Crops | Truck_Crops_Berries |
| 46 | Sweet Potatoes | Truck_Crops_Berries |
| 47 | Misc Vegs & Fruits | Truck_Crops_Berries |
| 48 | Watermelons | Truck_Crops_Berries |
| 49 | Onions | Truck_Crops_Berries |
| 50 | Cucumbers | Truck_Crops_Berries |
| 51 | Chick Peas | Truck_Crops_Berries |
| 52 | Lentils | Truck_Crops_Berries |
| 53 | Peas | Truck_Crops_Berries |
| 54 | Tomatoes | Truck_Crops_Berries |
| 55 | Caneberries | Truck_Crops_Berries |
| 57 | Herbs | Truck_Crops_Berries |
| 206 | Carrots | Truck_Crops_Berries |
| 207 | Asparagus | Truck_Crops_Berries |
| 208 | Garlic | Truck_Crops_Berries |
| 209 | Cantaloupes | Truck_Crops_Berries |
| 213 | Honeydew Melons | Truck_Crops_Berries |
| 214 | Broccoli | Truck_Crops_Berries |
| 216 | Peppers | Truck_Crops_Berries |
| 219 | Greens | Truck_Crops_Berries |
| 221 | Strawberries | Truck_Crops_Berries |
| 222 | Squash | Truck_Crops_Berries |
| 227 | Lettuce | Truck_Crops_Berries |
| 229 | Pumpkins | Truck_Crops_Berries |
| 242 | Blueberries | Truck_Crops_Berries |
| 243 | Cabbage | Truck_Crops_Berries |
| 244 | Cauliflower | Truck_Crops_Berries |
| 245 | Celery | Truck_Crops_Berries |
| 246 | Radishes | Truck_Crops_Berries |
| 247 | Turnips | Truck_Crops_Berries |
| 248 | Eggplants | Truck_Crops_Berries |
| 249 | Gourds | Truck_Crops_Berries |
| 250 | Cranberries | Truck_Crops_Berries |
